# Supplementary material for: Prepregnancy Diabetes and Risk of Placental Vascular Disease
Source: Oxford University Press journal article supplement (doi:10.2337/dc07-0364), 2007-09-28
Supplement: dc070364-sup-onlineappendixdc0364.doc [file dc070364-sup-onlineappendixdc0364.doc]

**Appendix: ICD-9 codes used in the current study**

| **Disease** | **ICD-9 code(s)*** |
| --- | --- |
| Preeclampsia or eclampsia | 642.4-642.7 |
| Gestational hypertension | 642.3, 642.9 |
| Placental abruption | 641.2 |
| Placental infarction | 656.7 |
| Poor fetal growth or fetal growth restriction | 656.5, 764.9 |
| Hypertension outside of pregnancy | 401, 405 |
| Gestational diabetes mellitus | 648.8 |
| Tobacco use | 305.1 |
| Drug dependence | 304, 648.3 |

* Indicates coding by Canadian Classification of Procedure
